# Supplementary material
Source: publisher figshare collection journal article supplement (https://acs.figshare.com/ndownloader/files/3848914)
Supplement: Supplementary file 1 [file 3848914]

## Supporting information

### **Towards the first class of suicide inhibitors of key kallikreins involved in skin diseases**

Xiao Tan, Feryel Soualmia, Laetitia. Furio, Jean-François Renard, Isabelle Kempen, Lixian  
Qin, Bernard Pirotte, Maurice Pagano, Chahrazade El Amri, Alain Hovnanian, Michèle  
Reboud-Ravaux

#### **Table of contents**

**Figure S1.** Inhibition of kallikreins by selected coumarin derivatives after 15 min incubation at 37°C. Inhibition of KLK5 (A) and KLK7 (B) by compound **4d**, KLK5 by compound **63** (C), KLK7 by compound **35** (D), KLK5 (E) and KLK7 (F) by compound **49**.  $[KLK5]_0 = 0.6 \text{ nM}$ ;  $[Boc-VPR-AMC]_0 = 100 \text{ }\mu\text{M}$ ;  $[KLK7]_0 = 7.6 \text{ nM}$ ;  $[Succ-LLVY-AMC]_0 = 40 \text{ }\mu\text{M}$ . Experimental points were fitted to equation 1. Page S2

**Figure S2.** Determination of the mechanism of inhibition of compound **63** on KLK5. Lineweaver and Burk plot with  $[I]_0 = \square, 50 \text{ }\mu\text{M}$ ;  $\blacksquare, 20 \text{ }\mu\text{M}$ ;  $\circ, 10 \text{ }\mu\text{M}$ ;  $\bullet, 0 \text{ }\mu\text{M}$ . F.U = arbitrary fluorescence unit. Page S3

**Human samples** Page S4

**Molecular docking specification** Page S5

**References of supporting information** Page S6

## Figure legends

**Figure 1S.** Inhibition of kallikreins by selected coumarin derivatives after 15 min incubation at pH 8.0 and 37°C. Inhibition of KLK5 (A) and KLK7 (B) by compound **4d** and KLK5 by compound **56** (C).  $[\text{KLK5}]_0 = 0.6 \text{ nM}$ ;  $[\text{Boc-VPR-AMC}]_0 = 100 \text{ }\mu\text{M}$ ;  $[\text{KLK7}]_0 = 7.6 \text{ nM}$ ;  $[\text{Succ-LLVY-AMC}]_0 = 40 \text{ }\mu\text{M}$ . Experimental points were fitted to equation 2.

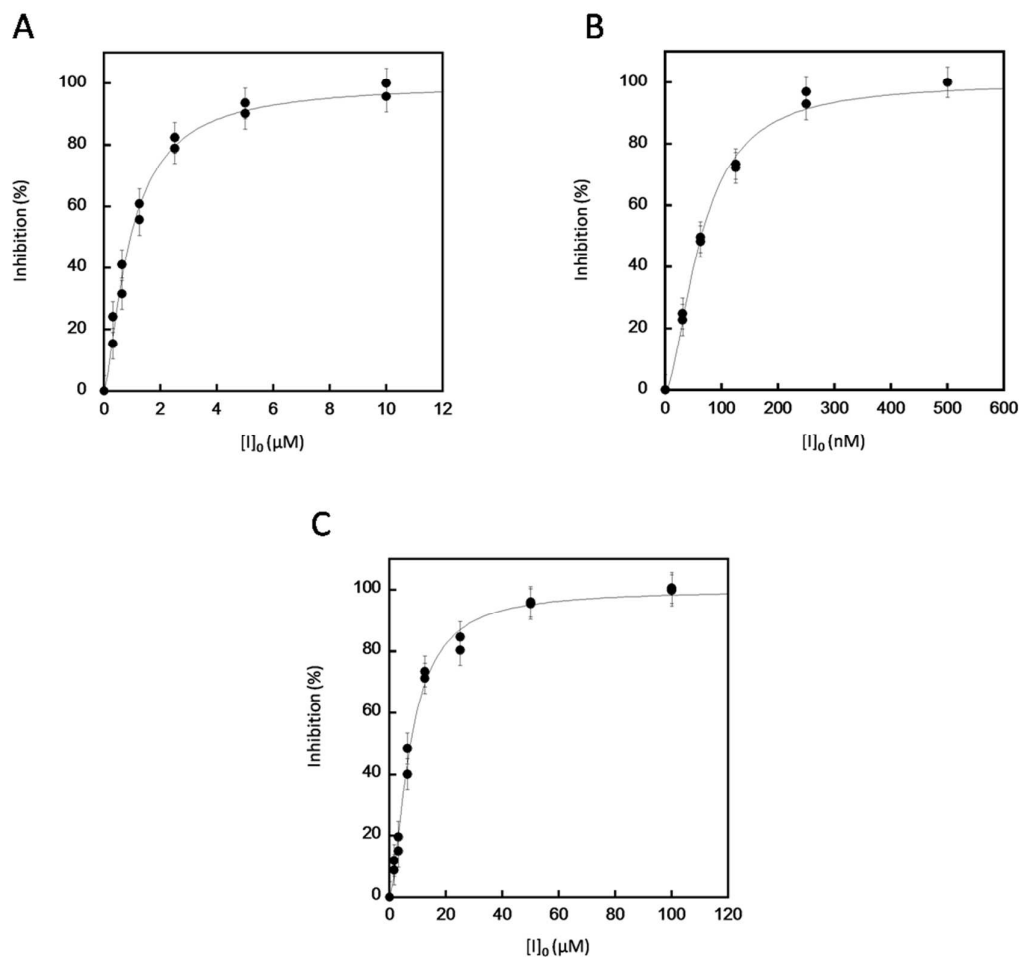

**Figure 2S.** Mechanism of inhibition of KLK5 by compound **56**. Lineweaver and Burk plot obtained at pH 8.0 and 37 °C.  $[E]_0 = 0.6$  nM;  $[I]_0 = 50$   $\mu$ M ( $\square$ ); 20  $\mu$ M ( $\blacksquare$ ); 10  $\mu$ M ( $\circ$ ); 0 ( $\bullet$ ). F.U. = arbitrary fluorescence unit.

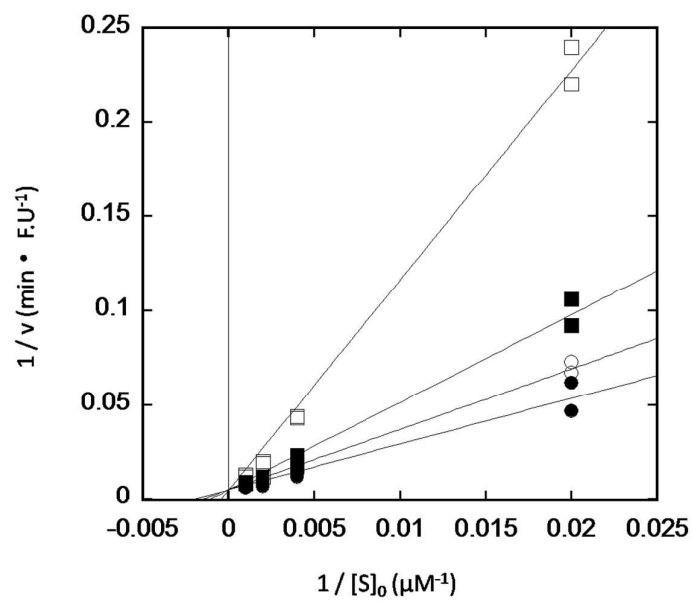

## Human samples

For experiments using human samples, we obtained written informed consent from healthy donors in the context of a protocol approved by the local CPP Ile de France VI committee (N° 2013-A00275-40).

## Molecular docking specification

The binding of selected bioactive molecules within the enzyme active sites were carried out using the docking engine CLC Drug Discovery Workbench version 1.0.2. The enzyme structures were retrieved from PDB (file 2PSX for KLK5<sup>1</sup>, file 2QXH for KLK7<sup>2</sup> and file 1EAX for matriptase<sup>3</sup>). In all cases, ligands structures (leupeptin for KLK5, succinyl-Ala-Ala-Pro-Phe-chloromethylketone for KLK7 and benzamidine for matriptase), and heteroatoms were removed from the crystal. Hydrogen atoms were added. The binding pocket around the catalytic triad residues was calculated by 'Find Binding Pockets' tool (CLC Drug Discovery Workbench 1.0.2). The scoring function PLANTS<sub>PLP</sub> search algorithm was used.<sup>4</sup> The coumarin three-dimensional structures were generated by Balloon program<sup>5</sup> and flexible docking calculations were performed (100 iterations for each ligand). Up to 50 poses were subsequently analyzed. Figures were prepared with Pymol (DeLano Scientific LLC, San Carlos, CA, USA).

## References of supporting information

- (1) Debela, M.; Goettig, P.; Magdolen, V.; Huber, R.; Schechter, N. M.; Bode, W. Structural basis of the zinc inhibition of human tissue kallikrein 5. *J. Mol. Biol.* **2007**, 373, 1017-1031.
- (2) Debela, M.; Hess, P.; Magdolen, V.; Schechter, N. M.; Steiner, T.; Huber, R.; Bode, W.; Goettig, P. Chymotryptic specificity determinants in the 1.0 Å structure of the zinc-inhibited human tissue kallikrein 7. *Proc. Natl. Acad. Sci. U. S. A.* **2007**, 104, 16086-16091.
- (3) Friedrich, R.; Fuentes-Prior, P.; Ong, E.; Coombs, G.; Hunter, M.; Oehler, R.; Pierson, D.; Gonzalez, R.; Huber, R.; Bode, W.; Madison, E. L. Catalytic domain structures of MT-SP1/matriptase, a matrix-degrading transmembrane serine proteinase. *J. Biol. Chem.* **2002**, 277, 2160-2168.
- (4) Korb, O.; Stutzle, T.; Exner, T. E. Empirical scoring functions for advanced protein-ligand docking with PLANTS. *J. Chem. Inf. Model.* **2009**, 49, 84-96.
- (5) Vainio, M. J., Johnson, M.S. Generating Conformer Ensembles Using a Multiobjective Genetic Algorithm *J. Chem. Inf. Model.* **2007**, 47, 2462-2474.
